# Supplementary material for: Mechanism of E Lian Granule Reversing Chronic Atrophic Gastritis With Intestinal Metaplasia Based on Integrated Pharmacology and&nbsp;GEO Gene Chip
Source: Research Square preprint supplement (doi:10.21203/rs.3.rs-174231/v1), 2021-02-12
Supplement: Supplementary file 1 [file b39c9b01ba8d59faa696032b.xlsx]

## Sheet: Sheet1
MIF
SHBG
CYP2A6
IGHG1
COMT
GABRA1
GABRA2
GABRA3
GABRA4
GABRA5
GABRA6
GABRG1
GABRG2
GABRG3
MTTP
SOAT1
SOAT2
ATP2A1
GABRB1
GABRB2
GABRB3
GABRD
GABRE
GABRP
GABRQ
HA
SCN2A
SCN4A
AKR1C1
AKR1C2
AR
CLEC4E
ESR1
ESR2
GRIN1
GRIN2A
GRIN2B
GRIN2C
GRIN2D
GRIN3A
GRIN3B
HSD17B1
LIP3
LSS
NCOA2
NR1I2
NR1I3
NR3C1
NR3C2
PGR
PPARA
RORA
SIGMAR1
SULT2A1
SULT2B1
VDR
ALB
PLA2G1B
PLA2G2E
PPARG
PTGS1
PTGS2
ALDH1L1
AMT
ATIC
DHRS4L1
FOLR1
FOLR2
FOLR3
FTCD
MPN348
MTFMT
MTHFD1
MTHFD2
MTHFR
MTR
NQO2
PNP
SHMT1
SHMT2
THYA
TK
TYMS
UL30
ABAT
ABL1
ACADSB
ACOX1
ACSL3
ACSL4
ADH5
ALDH5A1
ARF1
ARF6
C8G
CALM1
CNR1
CNR2
CYP2C8
ECI2
ELOVL4
FADS1
FADS2
FFAR1
FKBP1A
FURIN
GLTP
GM2A
GUCA1A
HAO1
HDAC2
HDAC9
HNF4A
HNF4G
INS
LALBA
LTB4R
LTB4R2
LTF
LY96
NCOA1
NR1H4
OGDH
PAEP
PKIA
PLA2G2A
PLA2G2D
PMP2
PPARD
PPA_RS05235
PPP3CA
PPP3R1
PPT1
PRKACA
PVR
RCVRN
RHO
RXRA
RXRB
RXRG
S100B
SCN10A
SCN11A
SCN1A
SCN1B
SCN2B
SCN3A
SCN3B
SCN4B
SCN5A
SCN7A
SCN8A
SCN9A
SEC14L2
SLC8A1
SREBF1
TLR4
TM1468
TRAPPC3
TRPV1
VLDLR
ACO2
AKR1D1
ALAD
ASPH
BBOX1
HBA1
HBB
HSD17B6
OXCT1
OXCT2
P3H1
P3H2
P3H3
P4HA1
P4HA2
PLOD1
PLOD3
SDHA
SDHB
SDHC
SDHD
SLC13A1
SLC13A2
SLC13A3
SLC25A10
SRD5A2
SUCLA2
SUCLG1
SUCLG2
SUCNR1
TMLHE
TYR
AOX1
DHODH
DPYD
TTHA0718
UCKL1
UL2
XDH
E
BLLF1
FAAH
ACHE
BCHE
PCYT1A
PCYT1B
PHOSPHO1
PLD1
PLD2
CPA1
TRPV3
HCAR2
HCAR3
NNMT
QPRT
ALDH1A1
ALDH1A2
ALDH1A3
APOD
DHRS3
DHRS4
HPGDS
LRAT
RBP1
RBP3
RDH11
RDH12
RDH13
RDH14
RDH5
RDH8
RETSAT
RLBP1
camC
CYTH2
P2RY12
PTGIR
PTGIS
CTRB1
ACOT13
ANXA1
ATP1A1
ATP1A2
ATP1A3
CASP3
GLRA3
HSD11B1
HSD11B2
HSD3B1
LPL
NFKB1
NFKB2
PPP1CC
SLCO1B3
TNF
YWHAE
NQO1
AMN
CUBN
MMAA
MMAB
MMACHC
MTRR
MUT
TCN1
ACACB
ACP1
APRT
MTAP
PECR
PIM1
SRPK2
AKR1C3
CYP17A1
NFKBIA
OPRK1
ORM1
IGHG2
IL1B
ADH1C
CES1
COX4I1
COX5A
COX5B
COX6A2
COX6B1
COX6C
COX7A1
COX7B
COX7C
COX8A
CYP27B1
EFTUD1
ESRRG
FABP6
FECH
GPBAR1
GSTP1
HOXA10
MT-CO1
MT-CO2
MT-CO3
NPPB
PRLR
ALOX5
HMGCR
ITGAL
ITGB2
NR1I3,
ADH1B
AHSP
CP
CYB5A
EGLN1
FEN1
FTH1
FXN
HDAC8
ISYNA1
ITPR1
NAGA
NEIL1
NEIL2
PAPSS1
POLB
TF
TFRC
TGFBR2
TRDMT1
AADACL2
IL6
CYP19A1
PYGM
CACNA1C
CACNA1D
CACNA1F
CACNA1S
CACNB1
CACNB2
CACNB3
CACNB4
TRPA1
TRPM8
MAOB,
ccrA
gag-pol
METAP2
RNASE1
TPI1
CDK6
UGT3A1
AHR
ALDH2
AURKB
CBR1
DHFRL1
DNMT1
TOP2A
TOP2B
LCN2
PIK3CA
PIK3CG
PIK3R1
PLK1
DGKA
PPP2CA
PPP2CB
PRKCA
PRKCB
SEC14L3
SEC14L4
ACTB
AKT1
ATP5A1
ATP5B
ATP5C1
CA1
CA12
CA14
CA2
CA3
CA4
CA5A
CA5B
CA6
CA7
CA9
CEBPB
CSNK2A1
CSNK2B
CYP1B1
EIF3F
ESRRA
ESRRB
GPER1
HCK
HIBCH
HSP90AA1
HSPA2
JAK1
PTK2B
RUVBL2
SF3B3
SQLE
STK17B
SYK
UBA1
SMO
BGLAP
F10
F2
F7
F9
GGCX
PROC
PROS1
PROZ
VKORC1
VKORC1L1
ABCC5
ATP6
BECN1
CHRNA4
HSD17B2
ABO
KANSL3
ERG11
PTGR1
IGKC
MAOB
HSD17B11
DBI
LCN9
MB
RARA
RARB
RARG
BCL2
G6PD
HSD3B2
nprS
TUBB
BIRC5
ADRA2A
ADRA2B
ADRA2C
CALY
CHRM2
CHRNA2
CHRNA7
DRD1
DRD2
DRD3
DRD4
DRD5
HTR1A
HTR1B
HTR1D
HTR2A
HTR2B
HTR2C
HTR3A
AMY1A
AMY2A
AMY2B
BAMF_RS28815
GCK
GLT6D1
GNPDA1
HK1
IFNB1
KRTAP5-2
KRTAP5-3
LCT
LCTL
LGALS2
LGALS3
LGALS7
MBL2
NCAN
NUDT9
PYGL
SFTPD
SIGLEC1
SMARCA5
TM0024
CYP2B6
EDNRA
prr
CAC2D1
BCAT1
BCAT2
EGF
GATM
HNF1A
LARS
LARS2
LCMT1
LCMT2
OTC
PAH
PTH
ADRA1A
ADRB1
ADRB2
ATF1
ATF2
ATF3
ATF4
ATF5
ATF6
ATF7
FOS
IL2
JDP2
JUN
NFATC1
SLC18A2
SLC6A2
SLC6A3
SLC6A4
CPT1A
CPT2
KCNH2
A103R
ABCA1
ABCB1
ABCB11
ABCC1
ABCC2
ABCC4
ABCC6
ABCC8
ABCC9
ABCG1
ABL2
ACSL1
ACSS1
ACSS2
ACVR1
ACVR1B
ACVRL1
ADA
ADCY1
ADK
ADORA1
ADORA2A
ADORA2B
ADORA3
ADRBK1
ADRBK2
ADSSL1
AFG3L2
AHCY
ALK
AMHR2
APAF1
ARAF
ARF4
ARL1
ARL3
ARL5A
ARL5B
AS1
ASNS
ASS1
BAG1
BALF5
CDC42
CDK15
CFTR
CREB1
CSNK1G2
DCK
DCPS
DLG4
EEF1A1
EEF2
EIF2S3
EIF4E
ENPP1
FBP1
FHIT
GLUD1
GMDS
GMPR
GI1
GT1
GSG2
GSPT1
GUK1
HCN2
HINT1
HRAS
HSP90B1
HSPA8
IMPDH1
IMPDH2
IRGC
L
LSM6
MAPK3
E1
NME1
NME2
NT5C2
P2
PAPS
PB1
PDE4B
PDE4D
PDE5A
PFKFB1
POLA1
PPP5C
PRKAA1
PRKAB1
PRKAB2
PRKAR1A
RAB11A
RAB5A
RAB7A
RAB8B
RAB9A
RAC1
RALA
RAN
RAP2A
RHEB
RHOA
RSE1
RND3
RPL10L
RPL11
RPL13A
RPL15
RPL19
RPL23
RPL23A
RPL26L1
RPL3
RPL37
RPL8
RRM1
RSL24D1
SAR1B
SLC25A4
STM4066
TGM2
TGM3
TK2
TLR7
TNK2
TTHA1435
TUFM
UCK2
SCO5081
ECE1
MAN1B1
GAPDHS
ADCY2
ADCY5
GS
ALOX15
APP
CLEC14A
ITGA5
ITGB3
KHSRP
MTNR1A
MTNR1B
PI4K2B
SLC2A1
YARS
IGKV2-30
snoaL
SLC5A2
NOS2
NR0B1
